# Supplementary material for: Intensity Estimation for Poisson Process With Compositional Noise
Source: Frontiers journal article supplement (doi:10.3389/fams.2021.648984), 2021-09-02
Supplement: Data_Sheet_1.pdf [file Data_Sheet_1.pdf]

## APPENDICES

1 A. Proof on proper metric  $d_{ext}$ 

2 PROOF. We prove that  $d_{ext}$  is a proper metric by verifying three properties:

- 3 1. (Positive Definiteness) It is apparent that  $d_{ext}(f_1, f_2) \geq 0$ . By Theorem 1, there exists  $\gamma_{12}$ , such that  
 4  $f_1 = (f_2; \gamma_{12})$ . Therefore,  $d_{ext}(f_1, f_2) = 0 \Leftrightarrow \|1 - \sqrt{\dot{\gamma}_{12}}\| = 0 \Leftrightarrow \gamma_{12}(t) = \gamma_{id}$ . Hence,  $f_1 = f_2$ .
- 5 2. (Symmetry)  $\|1 - \sqrt{\dot{\gamma}_{21}}\|^2 = \|1 - \sqrt{\dot{\gamma}_{12}^{-1}}\|^2 = \int_0^1 \left(1 - \sqrt{\dot{\gamma}_{12}^{-1}(s)}\right)^2 ds = \|1 - \sqrt{\dot{\gamma}_{12}(t)}\|^2$ . Therefore,  
 6  $d_{ext}(f_1, f_2) = d_{ext}(f_2, f_1)$ .
- 7 3. (Triangle Inequality) Let  $f_2 = f_1(\gamma_{12}(t))$ ,  $f_3 = f_2(\gamma_{23}(t))$ ,  $\gamma_{13} = \gamma_{12} \circ \gamma_{23}$ . Then,  $d_{ext}(f_1, f_3) =$   
 8  $\|1 - \sqrt{\dot{\gamma}_{13}}\| = \|1 - \sqrt{(\dot{\gamma}_{12} \circ \gamma_{23}) \dot{\gamma}_{23}}\| \leq \|1 - \sqrt{\dot{\gamma}_{23}}\| + \|\sqrt{\dot{\gamma}_{23}} - \sqrt{\dot{\gamma}_{13}}\| = \|1 - \sqrt{\dot{\gamma}_{23}}\| + \|1 - \sqrt{\dot{\gamma}_{12}}\|$ .  
 9 Note that  $\|\sqrt{\dot{\gamma}_{23}} - \sqrt{\dot{\gamma}_{13}}\| = \|(1, \gamma_{23}) - (1, \gamma_{13})\| = \|(1, \gamma_{23}) - (1, \gamma_{12} \circ \gamma_{23})\| = \|1 - \sqrt{\dot{\gamma}_{12}}\|$  (by  
 10 isometry) Thus,  $d_{ext}(f_1, f_3) \leq d_{ext}(f_1, f_2) + d_{ext}(f_2, f_3)$ .

11 B. Proof on the consistency of  $\hat{f}$ 

LEMMA 1. Let  $g$  be a probability density function on  $[0, 1]$ .  $\{X_i\}_{i=1}^n$  are a set of i.i.d. random variables with density  $g$ . If  $\hat{g}_n$  is a modified kernel estimate with optimal bandwidth given in Algorithm 2, then

$$\int_0^1 |\hat{g}_n(t) - g(t)| dt \xrightarrow{a.s.} 0 \text{ (when } n \rightarrow \infty)$$

12 PROOF. Let  $\tilde{g}_n(t) = \frac{1}{nh_n} \sum_{i=1}^n K(\frac{t-X_i}{h_n})$  be the classical kernel estimator with kernel function  $K$  and  
 13 optimal bandwidth  $h_n$  (i.e.  $h_n \rightarrow 0$  and  $nh_n \rightarrow \infty$ ). Then, we can obtain from Equation 3.84 of that  
 14  $\int_0^1 |\tilde{g}_n(t) - g(t)| dt \xrightarrow{a.s.} 0$ .

15 As  $K(t) = 0$  when  $|t| < 1$ , we have

$$\begin{aligned} & \int_0^1 |\hat{g}_n(t) - \tilde{g}_n(t)| dt \\ &= \int_0^{h_n} |\hat{g}_n(t) - \tilde{g}_n(t)| dt + \int_{1-h_n}^1 |\hat{g}_n(t) - \tilde{g}_n(t)| dt \\ & \quad + \int_{h_n}^{1-h_n} \left| \frac{1}{n+1} \tilde{g}_n(t) + \frac{1}{n+1} \right| dt \\ &\leq \int_0^{h_n} \hat{g}_n(t) dt + \int_0^{h_n} \tilde{g}_n(t) dt + \int_{1-h_n}^1 \hat{g}_n(t) dt + \int_{1-h_n}^1 \tilde{g}_n(t) dt + \frac{2}{n+1}. \end{aligned} \quad (1)$$

16 Here we will show that the first term goes to 0 (a.s.). Indeed,

$$\begin{aligned} \int_0^{h_n} \hat{g}_n(t) dt &= \int_0^{h_n} \frac{1}{nh_n} \sum_{i=1}^n K\left(\frac{t-X_i}{h_n}\right) dt = \int_0^{h_n} \frac{1}{nh_n} \sum_{X_i \leq 2h_n} K\left(\frac{t-X_i}{h_n}\right) dt \\ &\leq \int_0^1 \frac{1}{nh_n} \sum_{X_i \leq 2h_n} K\left(\frac{t-X_i}{h_n}\right) dt = \frac{1}{n} \sum_{X_i \leq 2h_n} 1 = \frac{1}{n} \sum_{i=0}^1 \mathbf{1}_{\{X_i \leq 2h_n\}} \end{aligned}$$

where  $1_{\{\cdot\}}$  is the indicator function. By the Strong Law of Large Numbers on triangular arrays,

$$\frac{1}{n} \sum_{i=0}^n (1_{\{X_i \leq 2h_n\}} - E1_{\{X_i \leq 2h_n\}}) \rightarrow 0 \text{ (a.s.)}$$

As  $E1_{\{X_i \leq 2h_n\}} = \int_0^{2h_n} f(t)dt \rightarrow 0$ , we have  $\int_0^{h_n} \hat{g}_n(t)dt \xrightarrow{\text{a.s.}} 0$ . The convergence to 0 for the second to fourth terms on the RHS of Eqn. (1) can be similarly proven, and therefore  $\int_0^1 |\hat{g}_n(t) - \tilde{g}_n(t)|dt \xrightarrow{\text{a.s.}} 0$ . Finally, we have

$$\int_0^1 |\hat{g}_n(t) - g(t)|dt \leq \int_0^1 |\hat{g}_n(t) - \tilde{g}_n(t)|dt + \int_0^1 |\tilde{g}_n(t) - g(t)|dt \xrightarrow{\text{a.s.}} 0.$$

LEMMA 2. Let  $G$  and  $\hat{G}_n$  denote the cumulative distribution functions of  $g$  and  $\hat{g}_n$  in Lemma 1, respectively. Assume the density  $g$  is continuous and for any  $t \in [0, 1]$ ,  $0 < m \leq g(t) \leq M < \infty$  (Condition 2 in Section 2.2). If  $G$  and  $\hat{G}_n$  are invertible and the inverse functions are differentiable, then

$$\int_0^1 (\sqrt{\dot{\hat{G}}_n^{-1}(t)} - \sqrt{\dot{G}^{-1}(t)})^2 dt \xrightarrow{\text{a.s.}} 0 \text{ (when } n \rightarrow \infty)$$

17 PROOF. To simplify notation, we let  $F = G^{-1}$ ,  $\hat{F}_n = \hat{G}_n^{-1}$ ,  $f = \dot{F} = \dot{G}^{-1}$ , and  $\hat{f}_n = \dot{\hat{F}}_n = \dot{\hat{G}}_n^{-1}$ .  
 18 For any  $t \in [0, 1]$ ,  $|\hat{G}_n(t) - G(t)| \leq \int_0^1 |\hat{g}_n(t) - g(t)|dt \xrightarrow{\text{a.s.}} 0$  (by Lemma 3). That is,  $\hat{G}_n \Rightarrow G$   
 19 (uniform convergence) almost surely. By the theory on convergence of inverse functions, we also got that  
 20  $\hat{F}_n \Rightarrow F$  (a.s.).

21 By definition,  $G(F(t)) = t$  and  $\hat{G}_n(\hat{F}_n(t)) = t$ . Using the chain rule, we have  $g(F(t))f(t) = 1$  and  
 22  $\hat{g}_n(\hat{F}_n(t))\hat{f}_n(t) = 1$ . Therefore,

$$\begin{aligned} & \int_0^1 |\hat{f}_n(t) - f(t)|dt \\ &= \int_0^1 \left| \frac{1}{\hat{g}_n(\hat{F}_n(t))} - \frac{1}{g(F(t))} \right| dt \\ &\leq \int_0^1 \left| \frac{1}{\hat{g}_n(\hat{F}_n(t))} - \frac{1}{g(\hat{F}_n(t))} \right| dt + \int_0^1 \left| \frac{1}{g(\hat{F}_n(t))} - \frac{1}{g(F(t))} \right| dt \end{aligned}$$

23 Here we will show that each integration in the right-hand side indeed converges to 0 (a.s.). By Lemma 1,

$$\begin{aligned} & \int_0^1 \left| \frac{1}{\hat{g}_n(\hat{F}_n(t))} - \frac{1}{g(\hat{F}_n(t))} \right| dt \\ &= \int_0^1 \left| \frac{1}{\hat{g}_n(s)} - \frac{1}{g(s)} \right| \hat{g}_n(s) ds \text{ (by change of variable)} \\ &= \int_0^1 \frac{1}{g(s)} |\hat{g}_n(s) - g(s)| ds \leq \frac{1}{m} \int_0^1 |\hat{g}_n(s) - g(s)| ds \xrightarrow{\text{a.s.}} 0 \end{aligned}$$

24 By assumption,  $g$  is continuous and positively bounded. Hence,  $1/g$  is also continuous. This continuity  
 25 is uniform because the domain  $[0, 1]$  is compact. That is, for any  $\epsilon > 0$ , there exists  $\delta > 0$ , such that for  
 26 all  $a, b \in [0, 1]$  with  $|a - b| < \delta$ ,  $|1/g(a) - 1/g(b)| < \epsilon$ . We have shown that  $\hat{F}_n \rightrightarrows F$  (a.s.). Hence, with  
 27 probability 1, there exists an integer  $N$  such that for any  $n > N$  and  $t \in [0, 1]$ , we have  $|\hat{F}_n(t) - F(t)| < \delta$ .  
 28  $\int_0^1 |\frac{1}{g(\hat{F}_n(t))} - \frac{1}{g(F(t))}| dt \leq \int_0^1 \epsilon dt = \epsilon$ . Therefore, we have shown that

$$\int_0^1 |\frac{1}{g(\hat{F}_n(t))} - \frac{1}{g(F(t))}| dt \xrightarrow{a.s.} 0.$$

Finally, based on the simple inequality  $(\sqrt{a} - \sqrt{b})^2 \leq |a - b|$ , we have

$$\int_0^1 (\sqrt{\hat{f}_n(t)} - \sqrt{f(t)})^2 dt \leq \int_0^1 |\hat{f}_n(t) - f(t)| dt \xrightarrow{a.s.} 0.$$

LEMMA 3. Let  $\{\gamma_i\}$  be a sequence of warping functions that satisfy Condition 3 in Section 2.2, and  $\bar{\gamma}$  be the Karcher mean of  $\{\gamma_i^{-1}\}$ . Then  $\bar{\gamma}$  converges to  $\gamma_{id}$  almost surely. That is,

$$\|(1, \bar{\gamma}) - 1\| \xrightarrow{a.s.} 0 \quad (\text{when } n \rightarrow \infty)$$

29 PROOF. By assumption,  $E(\sqrt{\dot{\gamma}_i^{-1}(t)}) \equiv \beta > 0, i = 1, \dots, n$ . Let  $S_n = n\bar{\gamma} = \sum_{i=1}^n \sqrt{\dot{\gamma}_i^{-1}}$ . As  
 30  $\{\sqrt{\dot{\gamma}_i^{-1}}\}$  are i.i.d.,

$$\begin{aligned} E(\|S_n - n\beta\|^4) &= E\left(\left\|\sum_{i=1}^n (\sqrt{\dot{\gamma}_i^{-1}} - \beta)\right\|^4\right) \\ &= nE\left(\left\|\sqrt{\dot{\gamma}_1^{-1}} - \beta\right\|^4\right) + n(n-1)\left(E\left(\left\|\sqrt{\dot{\gamma}_1^{-1}} - \beta\right\|^2\right)\right)^2 \\ &\quad + 2n(n-1)\left(E\left(\int_0^1 (\sqrt{\dot{\gamma}_1^{-1}(t)} - \beta)(\sqrt{\dot{\gamma}_2^{-1}(t)} - \beta) dt\right)\right)^2 \end{aligned}$$

31 As  $\|\sqrt{\dot{\gamma}_1^{-1}}\| = 1$ , there exist positive constants  $C$  and  $N$ , such that  $E(\|S_n - n\beta\|^4) < Cn$  when  $n > N$ .

Using the generalized Chebyshev inequality, for any  $\epsilon > 0$  and  $n > N$ ,

$$P\left(\left\|\frac{S_n - n\beta}{n}\right\| > \epsilon\right) \leq \frac{1}{(n\epsilon)^4} E(\|S_n - n\beta\|^4) \leq \frac{C}{\epsilon^4 n^2}.$$

32 This indicates that  $\sum_{n=1}^{\infty} P(\|S_n - n\beta\| \geq n\epsilon) < \infty$ . By the Borel-Cantelli lemma,  $P(\|S_n - n\beta\| \geq$   
 33  $n\epsilon \text{ i.o.}) = 0$ . Therefore,  $\|\frac{1}{n} \sum_{i=1}^n \sqrt{\dot{\gamma}_i^{-1}} - \beta\| \xrightarrow{a.s.} 0$ . Finally, we have

$$\|(1, \bar{\gamma}) - 1\| = \|\sqrt{\bar{\gamma}} - 1\| = \left\| \frac{\frac{1}{n} \sum_{i=1}^n \sqrt{\dot{\gamma}_i^{-1}}}{\frac{1}{n} \|\sum_{i=1}^n \sqrt{\dot{\gamma}_i^{-1}}\|} - 1 \right\| \xrightarrow{a.s.} 0.$$

34 LEMMA 4. Assume  $Y_m$  is a random variable following a Poisson distribution with mean  $\Lambda_m$ . If  
 35  $\lambda_m \geq \alpha \log(m)$ ,  $\alpha > 1$  for sufficiently large  $m$  (Condition 4 in Section 2.2), then  $Y_m \rightarrow \infty$  (a.s.) when  
 36  $m \rightarrow \infty$ .

37 PROOF. Based on the Poisson density formula, for any  $K = 1, 2, \dots$ ,  $P(Y_m \leq K) = e^{-\lambda_m} \sum_{k=0}^K \frac{\lambda_m^k}{k!}$ .  
 38 By assumption,  $\lambda_m \geq \alpha \log(m)$ ,  $\alpha > 1$  for sufficiently large  $m$ . It is apparent that when  $m$  is sufficiently  
 39 large,  $e^{-\frac{\alpha/2}{1+\alpha} \lambda_m} \sum_{k=0}^K \frac{\lambda_m^k}{k!} < 1$ . Hence,

$$\begin{aligned} m^{1+\alpha/2} P(Y_m \leq K) &= m^{1+\alpha/2} e^{-\lambda_m} \sum_{k=0}^K \frac{\lambda_m^k}{k!} \\ &= e^{-\frac{1+\alpha/2}{1+\alpha} \lambda_m + (1+\alpha/2) \log m} \left( e^{-\frac{\alpha/2}{1+\alpha} \lambda_m} \sum_{k=0}^K \frac{\lambda_m^k}{k!} \right) \\ &\leq 1 \cdot 1 = 1. \end{aligned}$$

Consequently, for sufficiently large  $m$ ,  $P(Y_m \leq K) \leq \frac{1}{m^{1+\alpha/2}}$ . Hence,  $\sum_{m=1}^{\infty} P(Y_m \leq K) < \infty$ . By the Borel-Cantelli lemma,

$$P(\limsup\{Y_m \leq K\}) = P(Y_m \leq K \text{ i.o.}) = 0.$$

Equivalently, we have  $P(Y_m > K \text{ eventually}) = 1$ , for any  $K = 1, 2, \dots$ . Therefore,

$$\lim_{m \rightarrow \infty} Y_m = \infty. \text{ (a.s.)}$$
